# Supplementary material for: Establishment of a Virus-Induced Gene-Silencing (VIGS) System in Passiflora edulis Sims and Its Use in the Functional Analysis of PechlH
Source: MDPI journal article supplement (doi:10.3390/horticulturae10040422), 2024-04-22
Supplement: s1 [file s1]

A

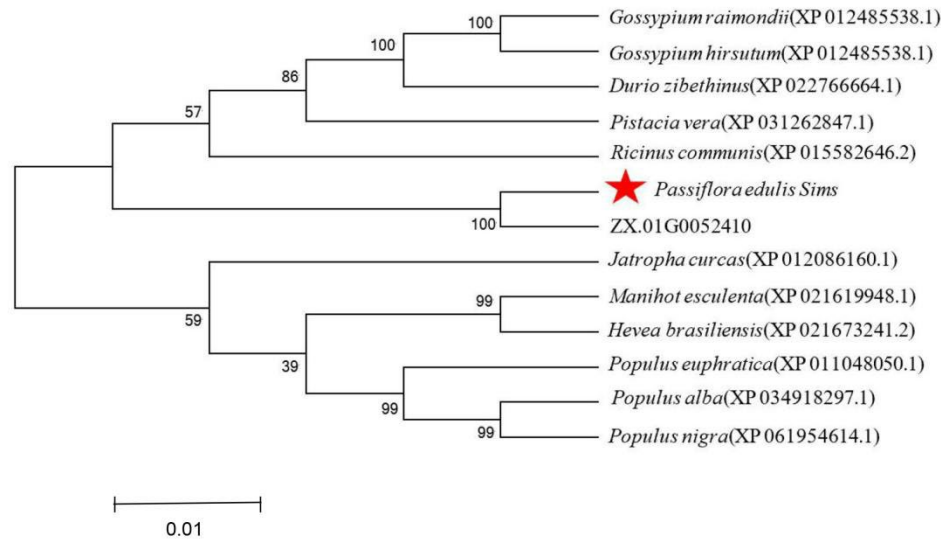

B

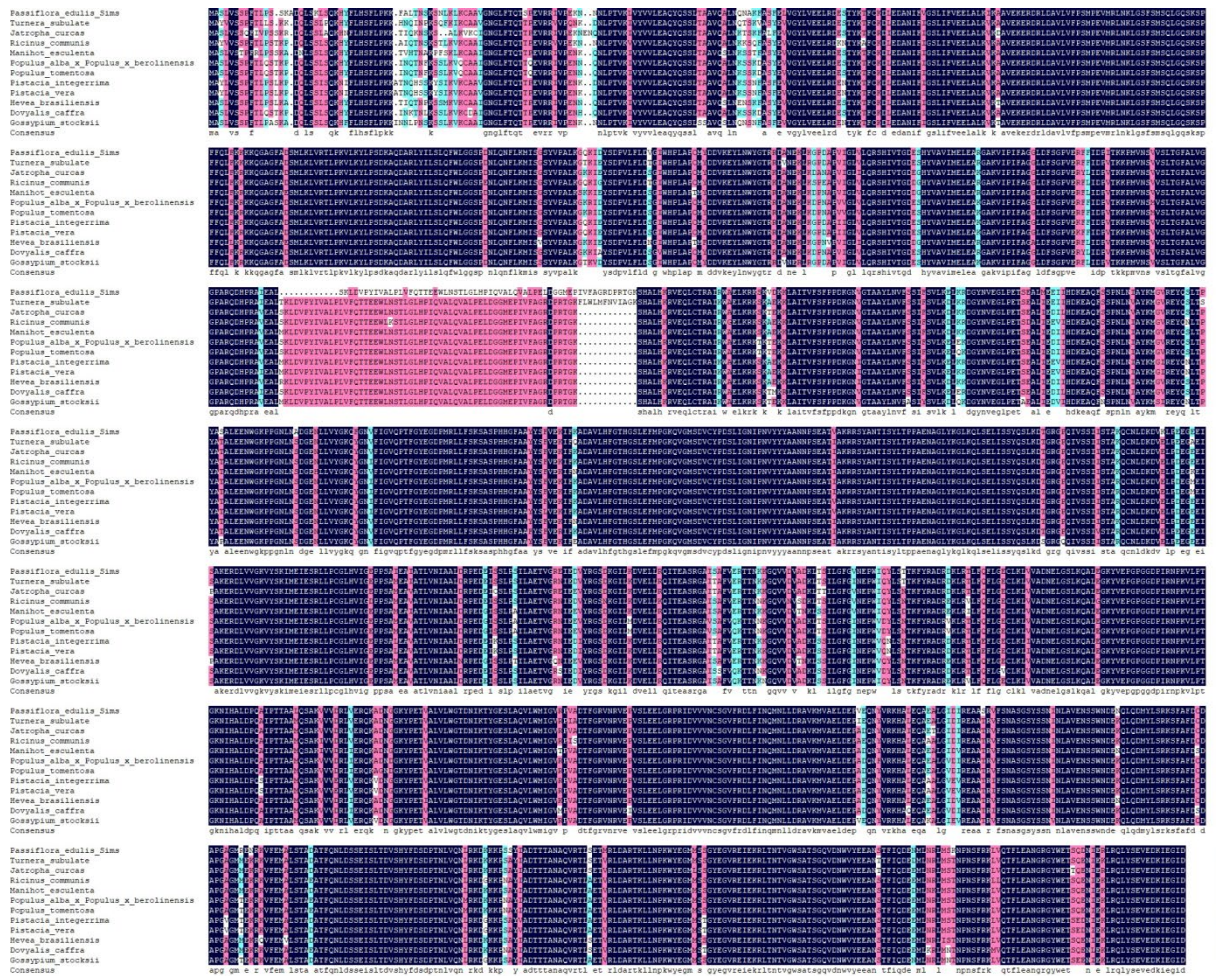

**Figure S1.** Bioinformatics analysis of *PeCHLH* in *Passiflora edulis*. (A) Phylogeny during the evolution of *Passiflora edulis*; (B) The amino acid sequence alignment analysis with other species.

**Table S1.** The efficiency of infection in different *Agrobacterium* densities

| OD <sub>600</sub> | Vacuum Pressure (KPa) | Infection Efficiency (%) |
|-------------------|-----------------------|--------------------------|
| 0.8               | 0.8                   | 46.70%                   |
| 1.0               | 0.8                   | 23.30%                   |
| 1.2               | 0.8                   | 33.30%                   |

**Table S2.** Efficiency of the infestation of passion fruit seedlings of different cultivars

| Variety Name         | Silence Efficiency |
|----------------------|--------------------|
| Tainong              | 6.3%               |
| Purple Passion Fruit | 3.1%               |
| Qin Mi No.9          | 0%                 |
| Guava-flavored       | 35.6%              |

**Table S3.** List of gene-specific primers used for gene cloning.

|                                      | Gene and primer name                        | Forward primer (5' to 3')                      | Reverse primer (5' to 3')                      | Source     |
|--------------------------------------|---------------------------------------------|------------------------------------------------|------------------------------------------------|------------|
| PCR for MP                           | MP (MPF/MPR)                                | CGCAGTACAAGGTTGAATACAGT                        | CTCAATCGTCTTCATCTCCACTT                        | This study |
| PCR for CP                           | CP (CPF/CPR)                                | CTAACAGTGCTCTTGGTGTGATT                        | CAACTCCATGTTCTCTAACGAAGT                       | This study |
| Gene cloning for <i>PePDS</i>        | <i>PDS</i> ( <i>PDSF</i> / <i>PDSR</i> )    | tgagtaagggtaccggaattcCTTCATGCGAGTGTT<br>CCT    | GGGACATGCCCCGGGCCTCGAGTCAACTCATCCTT<br>GCCTC   | This study |
| Gene cloning for <i>PechlH</i>       | <i>chlH</i> ( <i>CHF</i> / <i>CHR</i> )     | tgagtaagggtaccggaattcGGCATTGGCATAGTT<br>AATGAC | GGGACATGCCCCGGGCCTCGAGCTTGAGATGCAT<br>TGTGTGAC | This study |
| Gene cloning for <i>pTRV2-PechlH</i> | <i>chlH</i> ( <i>tRCHF</i> / <i>tRCHR</i> ) | tgagtaagggtaccggaattcGCAGGCATGAGAGA<br>GAACAG  | GGGACATGCCCCGGGCCTCGAGAATCTCCCTAAC<br>ACCCTCAT | This study |
| Gene cloning for <i>pTRV2-PePDS</i>  | <i>PDS</i> ( <i>tRPDF</i> / <i>tRPDR</i> )  | tgagtaagggtaccggaattcCTTCATGCGAGTGTT<br>CCT    | GGGACATGCCCCGGGCCTCGAGCTTTCAGTGGCTT<br>AGCAG   | This study |
| For RT-qPCR                          | <i>PDS</i> ( <i>qPDSF</i> / <i>qPDSR</i> )  | TGCTTATGTGTTTGCCACT                            | ATTAATAACAGGAACTCCGACT                         | This study |
| For RT-qPCR                          | <i>chlH</i> ( <i>qCHF</i> / <i>qCHR</i> )   | AAGAAATTGGCCCTAACCAAC                          | TTCAGGCACTATTCTACGAAC                          | This study |
| For RT-qPCR                          | <i>60S</i> ( <i>qSF</i> / <i>qSR</i> )      | AGGTGGGTAACAGGATTATC                           | TGGCTGTCTTTTGGTGCTG                            | This study |

**>The structural domain fragments of *PePDS* cDNA: (1695 bp)**

CTTCATGCGAGTGTTCTGCTTTGAATTTTAGCCGGCAAAGCAATGCCTTGGATGTTGAAACTG  
CCTTTCTTCTCCCTCAGATGCGGTGCTCATCCTTCTTCTTTAAAAATTCAATCTGCAAATCCCCG  
TAAAGCAGGTCTCAGGAGTGTCTCCCGCCCCTGAAGGTAGTTTGCCTGGACTATCCTAGACCG  
GACCTTGATAACACCGCCAATTTCTTGAAGCTGCACTCTTATCATCCTCCTTTGCACTCGTTCA  
CGTCCTGCTAAGCCACTGAAAGTCGTTATTGCTGGTGCAGGTTTGGCTGGTCTATCGACTGCTAA  
ATATTTGGCGGATGCAGGTCATAAGCCTTTATTACTCGAAGCAAGAGATGTTCTAGGTGAAAAG  
GTGGCTGCGTGGAAAGATGATGATGGGGACTGGTATGAGACAGGGTTGCATATATTCTTTGGGG  
CATACCCAAATGTCCAAAACCTGTTTGGAGAACTTGATATCAATGATAGGCTGCAGTGGAAGGA  
GCACTCTATGATCTTTGCAATGCCAAACAAGCCTGGAGAGTTCAGCCGTTTTGATTTCCCTGAAA  
ATCTGCCTGCACCCTTAAATGGAATATTGGCGATTTTAAAGAACAATGAAATGCTGACTTGGCCA  
GAAAAAATAAAGTTTGCAATTGGTCTCCTTCCAGCAATGGTTGGTGGACAACCTTATGTTGAGG  
CTCAAGATGGTCTGACGGTTAAGGAATGGATGCGAAAGCAGGGTGTACCTGATCGAGTACTA  
CTGAGGTGTTCAATGCCATGTCAAAGGCACTTAACTTCATAAATCCTGATGAACTTCAATGCAG  
TGCATCTTGATTGCGCTGAACCGATTTCTACAGGAGAAAAATGGTTCCAGGATGGCTTTCTTAGA  
CGGTAATCCCCCAGAAAGACTCTGCATGCCAATTGCTGACCATATTCAGTCACTGGGTGGTGAA  
GTCAGACTTAATTCTCGAATAAAAAAGAATTGACCTAAATGATGATGGGACAGTAAAGAGCTTTG  
TTTTAAACAGTGGGGATGTGATTGAAGGGGATGCTTATGTGTTTGCCACTCCAGTTGACATCCTG  
AAGCTAATTTTGCCTGACCGTTGGAAAGAGATGCCATACTTCAATAAGTTGGAGAACTAGTCG  
GAGTTCCTGTTATTAATGTACATATATGGTTTGACAAAAAATTGAAGAATACGTATGATCATCTC  
CTCTTTAGCAGAAGTCCCCTTCTAAGTGTGTATGCAGATATGTCTTTGACGTGCAAGGAATATTA  
CAACCCAAATCAATCAATGCTGGAATTAGTTTTTCTCCAGCAGAAGAGTGGATCTCTCGCAGT  
GACTCGGAGATCATTGATGCCACTATGAAAGAACTTGCAAAACTCTTTCCTGATGAAATATCTGC  
AGATCAGAGCAAAGCAAAAAATTGTTAAATACCATGTTGTCAAACACCCAGGTCTGTTTACAAG  
ACTGTGCCCCGATTGTGAACCTTGTGACCGTTGCAAAGATCACCAATAGAAGGTTTCTATTTATC  
TGGTGATTACACAAAACAGAAATATTTGGCTTCAATGGAAGGCGCTGTTCTATCTGGGAAGTTCT  
GTGCTCAGGCTATTGTACAGGACTACCAGTTGCTAGCTGCTCGTACGCAGGGTAAGTTGGCCGA  
GGCAAGGATGAGTTGA

**>The full-length cDNA of *PeChlh*: 4146 bp**

ATGGCTTCTCTAGTTTCCTCTCCTTTCACTTTACCATCTTCGAAAGCAGACCAACTCTCTAAGCTT  
TCTCAGAAGCATTACTTTCTCCATTCATTTCTACCCAAGAAATTTGCCCTAACCAACTCAAAATCC  
AACTTGAAACTAAAATGTGCTGCGGTTGGAAATGGCCTGTTTACACAGACTAGTCCAGAAGTTC  
GTAGAATAGTGCCTGAAAAGAACAACAATCTTCCTACTGTTAAACTGTTTATGTAGTCTTGAA  
GCTCAGTACCAATCGTCGCTCACTGCTGCAGTTCAAGCTTTAAACCAGAACGCCAAATTTGCCT  
CCTTTGAACTCGTCGGCTACTTGGTAGAGGAGCTTCGCGACGAATCAACATACAAAACCTTTCTGT  
AAGGACCTTGAAGATGCAAATATCTTTGTTGGGTCGTTGATTTTTGTTGAGGAGCTTGCTTTGAA  
GATCAAAGCTGCCGTGGAGAAAGAGCGGGATAGACTTGATGCAGTTTTGGTCTTCCCTCTATG  
CCTGAGGTAATGAGACTTAACAAGTTGGGTTCTTTCAGTATGTCCCAGCTTGGTCAGTCAAAGA  
GTCCATTCTTTCAGTTGTTCAAGAAAAAGAAGCAAGGTGCAGGTTTTGCCGACAGTATGTTAAA  
GTTGGTCAGGACGTTACCCAAGGTTCTAAAGTATTTGCCTAGTGATAAGGCTCAAGATGCTAGG  
CTTTATATCTTGAGTCTGCAGTTTTGGCTCGGCGGATCTCCTGATAACTTGCAAGATTTCTGAAG  
ATGATATCTGGCTCTTATGTCCCTGCATTGAAAGGGCAAAGATTGACTACTCTGACCCAGTTCT  
CTTCTTGACGTTGGCATTGTCACCCTTTGGCTCCTTGATGTATGATGATGTGAAAGAGTATTT

GAATTGGTACGGAAGCTAGAAGGGATGCTAATGAGAAGCTCAAGGGGCCTGATGCACCGGTGAT  
TGGGCTAGTTTTGCAAAGGAGTCACATTGTAAGTGGTGATGAGAGTCATTATGTGGCTGTGATA  
ATGGAATTGGAGGCAAGGGGTGCCAAAGTCATACCTATTTTCGCCGGTGGACTTGACTTTTCAG  
GGCCTGTTGAGAGGTTCTTCATTGATCCAATTACAAAGAAGCCAATGGTGAAGTTCGGTGGTATC  
ATTGACTGGTTTTGCTCTTGTGGAGGGCCAGCTAGGCAGGACCATCCTAGAGCTATTGAGGCC  
CTGAGCAAGCTTGATGTGCCTTACATTGTAGCGTTGCCTTTGGTGTTCAAACTACCGAAGAATG  
GTTGAACAGTACCCTTGGGTGACCCAATTCAGGTGGCTTTGCAAGTTGCACTTCCTGAGCTG  
GATGGAGGCATGGAGCCCATTGTCTTTGCTGGTCGAGATCCCAGAACAGGGAAATCACATGCC  
CTTCACAAGAGGGTGGAACAGCTCTGCACCAGGGCTATCAGATGGGCTGAACTGAAAAGAAAA  
TCAAAGTTGACAAGAAGTTAGCGATCACCGTCTTCAGTTTCCCTCCGGACAAAGGAAATGTAG  
GGACAGCAGCCTACCTCAATGTCTTCTCTTCATCTTCTGTTCTAAAAGAAGTCAAGAGAGAT  
GGTTACAACGTTGAGGGCCTTCCAGAGACATCAGAAGCCTTGATGGAAGAAATAATTCATGATA  
AAGAGGCCCAATTCAGCAGTCCTAATCTGAATATTGCCTATAAAATGGGTGTTGAGAAATACCA  
GAGTCTTACTCCTTACGCCTCTGCATTAGAGGAAAAGTGGGGCAAACCTCCTGGCAATTTGAAC  
GCTGACGGAGAGAATCTTTGGTCTATGGAAAACAGTTTGGTAATGTCTTCATTGGCGTCCAGCC  
GACTTTTGGCTATGAGGGTGATCCCATGCGGCTTCTGTTCTCCAAATCTGCAAGCCCACATCATG  
GATTTGCAGCTTACTACTCATTTGTTGAGAAAATCTTCAAAGCTGATGCGGTTCTTCACTTTGGAA  
CTCATGGTTCTCTTGAATTCATGCCAGGAAAGCAGGTGGGGATGAGTGATGTTTGCTATCCAGA  
CAGTCTCATTGGTAATATCCCCAATGTCTATTATTATGCAGCTAACAACCCATCTGAAGCCACAG  
TAGCAAAACGCCGTAGCTACGCAAACACTATTAGCTATTTGACCCCTCCAGCAGAAAACGCTGG  
ACTTTACAAGGGACTGAAGCAGTTGAGTGAGCTCATCTCCTCATACCAATCCCTCAAAGACACA  
GGCCGTGGGCCACAGATCGTAAGCTCCATTATCAGCACTGCCAAGCAATGCAATCTTGACAAA  
GATGTTAACTTCCGGAGGAAGGGGAGGAGATCTCTGCAAAAGAGCGGGATCTCGTGGTTGGT  
AAGGTGTACTCCAAGATTATGGAAATCGAATCCAGGCTTTTGCCCTGTGGGCTTCATGTCAATTGG  
TGAGCCCCCATCTGCCATTGAAGCTATTGCAACTCTAGTAAACATTGCCGCTCTAGACCGTCCTG  
AAGATGAGATTTTCACTCCCCTCCATATTGGCCGAAAGTGTGGGCGAGAGATAGAGGATGT  
TTATCGAGGAAGTGACAAGGGAATCTTGAAGGATGTGGAGCTTCTGAGACAAATAACTGAGGC  
ATCACGAGGTGCCATCAGTGCCTTCGTGGAGAGGACCACCAATAAGAAGGGTCAAGTTGTGGA  
TGTGGCTGATAAGCTTACCTCCATCCTTGGGTTTGGTGTTAACGAACCATGGATTCACTATTGT  
CGACCACGAAGTTTTACCGGGCAGATAGGGATAAGCTTAGAACACTGTTTCAGTTCCTCGGAGA  
GTGTTTGAACTGGTAGTCGCTGATAATGAGTTGGGAAGTCTGAAACAGGCCTTGGAGGGGAA  
ATATGTGGAACCAGGGCCCCGGTGGTGATCCAATCAGAAACCCGAAGGTGCTCCCCACAGGAAA  
GAACATTCATGCGCTGGACCCACAAGCCATTCTACGACAGCAGCATTGCAGAGTGCAAAAGT  
AGTGGTGGATAGATTAGTCGAGAGGCAGAAAGCTGACAATGGTGGGAAGTATCCTGAAACAGT  
CGCACTAGTGTTGTGGGGAAGTACCAATATCAAGACTTATGGTGAGTCCCTGGCTCAGGTCTTG  
TGGATGATAGGAGTGAGGCCAGTCGCCGATACCTTTGGTAGAGTTAACCGGGTTGAACCGGTG  
AGCCTTGAAGAGCTTGAAGGCCCAAGATCGACGTTGTTGTGAAGTCTCCGGAGTTTTTCAGAG  
ATCTTTTTATCAATCAGATGAACCTCCTGGACCGAGCAGTGAAGATGGTGGCTGAACTAGATGA  
GCCGGTGGAAACAAAAGTATGTTAGGAAACATGCGCTGGAGCAAGCTGAAGCCCTTGGCATCGA  
CATCCGGGAAGCTGCTTCACGAGTGTTCTTAATGCCTCGGGATCTTACTCCTCAAATATAAATC  
TTGCTGTGGAGAATTCATCATGGAATGATGAGAATCAGCTTCAAGACATGTACTTAAGCCGCAA  
GTCCTTTGCATTTGATTGTGATGCTCCAGGTGCAGGCATGAGAGAGAACAGAAAAGTTTTCGAG  
ATGGCTCTAAGCACAGCAGATGCCACCTTCCAAAACCTGGACTCCTCTGAAATCTCACTCACTG  
ATGTGAGCCACTATTTTGAAGTCAAGCCCAACAAACCTAGTGCAGAACCTGAGGAAGGACAAGA

AAAAGCCTAGCTCCTATATCGCAGACACAACAACAGCTAATGCTCAGGTACGCACACTGTCAG  
AGACCATGCGGCTCGATGCTCGAACCAAGTTGTTGAACCCCAAGTGGTATGAAGGCATGATGTC  
CAGTGGATATGAGGGTGTAGGGAGATTGAGAAGAGGCTCACAAACACAGTTGGATGGAGTGC  
AACTTCAGGGCAAGTTGACAACCTGGGTCTACGAAGAGGCCAACTCGACTTTCATTGAGGATGAG  
AACATGCTCAATAGGCTCATGAGCAAGAACCCCAATTCATTGAGGAAGTTGGTGCAGACATTCC  
TGGAGGCCAACGGACGTGGTACTGGGAACTTCTCAGGATAACATTGAAAGTTGAGGCAGC  
TATACTCGGAAGTTGAAGACAAGATTGAGGGCATTGATCGGTAG

**>PePDS amplified sequences in TRV2-PePDS: 283 bp**

CTTCATGCGAGTGTTCTGCTTTGAATTTTAGCCGGCAAAGCAATGCCTTGGATGTTGAAACTG  
CCTTTCTTCTCCCTCAGATGCGGTGCTCATCCTTCTTCTTTAAAAATTCAATCTGCAAATCCCCG  
TAAAGCAGGTCTCAGGAGTGTCTCCCGCCCCTGAAGGTAGTTTGGTGGACTATCCTAGACCG  
GACCTTGATAACACCGCCAATTTCTTGAAGCTGCACTCTTATCATCCTCTTTCGCACTCGTTCA  
CGTCTGCTAAGCCACTGAAAG

**>PechIH amplified sequences in TRV2-PechIH: 315 bp**

GCAGGCATGAGAGAGAACAGAAAAGTTTTGAGATGGCTCTAAGCACAGCAGATGCCACCTTC  
CAAAACCTGGACTCCTCTGAAATCTCACTCACTGATGTGAGCCACTATTTGACTCAGACCCAAC  
AAACCTAGTGCAGAACCTGAGGAAGGACAAGAAAAAGCCTAGCTCCTATATCGCAGACACAAC  
AACAGCTAATGCTCAGGTACGCACACTGTCAGAGACCATGCGGCTCGATGCTCGAACCAAGTT  
GTTGAACCCCAAGTGGTATGAAGGCATGATGTCCAGTGGATATGAGGGTGTAGGGAGATT

**>Mp nucleotide sequences: 759 bp**

ATGGAAGACAAGTCATTGGTCACCTTGAAGAAGAAGACTTTCGAAGTCTCAAAATTCTCAAATC  
TAGGGGCCATTGAATTGTTTGTGGACGGTAGGAGGAAGAGACCGAAGTATTTTACAGAAGAA  
GAGAACTGTCCTAAATCATGTTGGTGGGAAGAAGAGTGAACACAAGTTAGACGTTTTTGACCA  
AAGGGATTACAAAATGATTAAATCTTACGCGTTTCTAAAGATAGTAGGTGTACAACCTAGTTGTAA  
CATCACATCTACCTGCAGATACGCCTGGGTTCATTCAAATCGATCTGTTGGATTGAGACTTACT  
GAGAAAAGAAAGAGAGGAAAGACTATTCAGAGATTCAAAGCTCGAGCTTGCATAACTGTTCA  
GTTGCGCAGTACAAGGTTGAATACAGTATTTCCACACAGGAGAACGTACTTGATGTCTGGAAGG  
TGGGTTGTATTTCTGAGGGCGTTCCGGTCTGTGACGGTACATACCCTTTCAGTATCGAAGTGTG  
CTAATATGGGTTGCTACTGATTGACTAGGCGCCTCAATGTGGAAGAACTGAACAGTTCGGATT  
ACATTGAAGGCGATTTTACCGATCAAGAGGTTTTCGGTGAGTTCATGTCTTTGAAACAAGTGGA  
GATGAAGACGATTGAGGCGAAGTACGATGGTCCTTACAGACCAGCTACTACTAGACCTAAGTC  
ATTATTGTCAAGTGAAGATGTTAAGAGAGCGTCTAATAAGAAAAACTCGTCTTAA

**>Cp nucleotide sequences: 615 bp**

ATGGGAGATATGTACGATGAATCATTTGACAAGTCGGGCGGTCTGCTGACTTGATGGACGATT  
CTTGGGTGGAATCAGTTTCGTGGAAAGATCTGTTGAAGAAGTTACACAGCATAAAATTTGCACT  
ACAGTCTGGTAGAGATGAGATCACTGGGTACTAGCGGCACTGAATAGACAGTGTCTTATTCA  
CCATATGAGCAGTTTCCAGATAAGAAGGTGTATTTCTTTTAGACTCACGGGCTAACAGTGCTCT  
TGGTGTGATTGAGAACGCTTCAGCGTTCAAGAGACGAGCTGATGAGAAGAATGCAGTGGCGGG  
TGTTACAAATATTCCTGCGAATCCAAACACAACGGTTACGACGAACCAAGGGAGTACTACTACT  
ACCAAGGCGAACACTGGCTCGACTTTGGAAGAAGACTTGTACACTTATTACAAATTCGATGATG

CCTCTACAGCTTTCCACAAATCTCTAACTTCGTTAGAGAACATGGAGTTGAAGAGTTATTACCGA  
AGGAACTTTGAGAAAGTATTCGGGATTAAGTTTGGTGGAGCAGCTGCTAGTTCATCTGCACCGC  
CTCCAGCGAGTGGAGGTCCGATACGTCCTAATCCCTAG
